# 1 **Analysis of *Arabidopsis venosa4-0* supports the role of** 2 **VENOSA4 in dNTP homeostasis**

3  
4  
5 **Raquel Sarmiento-Mañús<sup>1</sup>, Rebeca González-Bayón<sup>1</sup>, Sara Fontcuberta-Cervera<sup>1</sup>,**  
6 **Matthew A. Hannah<sup>2,†</sup>, Francisco Javier Álvarez-Martínez<sup>3</sup>,**  
7 **Enrique Barrajon-Catalán<sup>3</sup>, Vicente Micol<sup>3</sup>, Víctor Quesada<sup>1</sup>,**  
8 **María Rosa Ponce<sup>1,\*</sup> and José Luis Micol<sup>1,\*</sup>**

9  
10 <sup>1</sup>Instituto de Bioingeniería, Universidad Miguel Hernández, Elche, Spain.

11 <sup>2</sup>Max-Planck-Institut für Molekulare Pflanzenphysiologie, Potsdam, Germany.

12 <sup>3</sup>Instituto de Investigación, Desarrollo e Innovación en Biotecnología Sanitaria de Elche,  
13 Universidad Miguel Hernández, Elche, Spain.

14 <sup>†</sup>Present address: BASF, BBCC - Innovation Center Gent, Gent, Belgium.

15  
16  
17 **\*Co-corresponding authors:**

18 José Luis Micol, [jlmicol@umh.es](mailto:jlmicol@umh.es)

19 María Rosa Ponce, [mrponce@umh.es](mailto:mrponce@umh.es)

20  
21 **Keywords:** dNTP homeostasis, *Arabidopsis*, *VENOSA4* gene, *ven4-0* mutant, SAMHD1  
22 ortholog

23  
24  
25 Number of words: 9102

Figures: 7

Tables: 0

26 Supplementary Figures: 7

Supplementary Tables: 6

27 **ABSTRACT**

28 An imbalance in the deoxyribonucleoside triphosphate (dNTP) pool caused by an  
29 increase or decrease in the levels of any of the four dNTPs leads to increased DNA  
30 mutations, overloading DNA repair mechanisms. The human protein SAMHD1 (Sterile  
31 alpha motif and histidine-aspartate domain containing protein 1) functions as a dNTPase  
32 to maintain the balance of the dNTP pool, as well as in DNA repair. In eukaryotes, the  
33 limiting step in *de novo* dNTP synthesis is catalyzed by RIBONUCLEOTIDE  
34 REDUCTASE (RNR), which consists of two R1 and two R2 subunits. In Arabidopsis,  
35 RNR1 is encoded by *CRINKLED LEAVES 8 (CLS8)* and RNR2 by three paralogous  
36 genes, including *TSO2 (TSO MEANING 'UGLY' IN CHINESE 2)*. In plants, the *de novo*  
37 biosynthesis of purines occurs within the chloroplast, and *DOV1 (DIFFERENTIAL*  
38 *DEVELOPMENT OF VASCULAR ASSOCIATED CELLS 1)* catalyzes the first step of  
39 this pathway. Here, to explore the role of *VENOSA4 (VEN4)*, the most likely Arabidopsis  
40 ortholog of human *SAMHD1*, we studied the *ven4-0* mutant. The mutant leaf phenotype  
41 caused by the *ven4-0* point mutation was stronger than those of T-DNA insertional *ven4*  
42 mutations. Structural predictions suggested that the E249L amino acid substitution in the  
43 mutated *VEN4-0* protein rigidifies its 3D structure compared to wild-type *VEN4*. The  
44 morphological phenotypes of the *ven4*, *cls8*, and *dov1* single mutants were similar, and  
45 those of the *ven4 tso2* and *ven4 dov1* double mutants were synergistic. The *ven4-0*  
46 mutant had reduced levels of four amino acids related to dNTP biosynthesis, including  
47 glutamine and glycine, which are precursors in the *de novo* purine biosynthesis pathway.  
48 Finally, despite its annotation in some databases, At5g40290, a paralog of *VEN4*, is likely  
49 a pseudogene. These observations support the previously proposed role of *VEN4* in  
50 dNTP metabolism. Our results reveal a high degree of cross-kingdom functional  
51 conservation between *VEN4* and *SAMHD1* in dNTP homeostasis.

## 52 INTRODUCTION

53 Deoxyribonucleoside triphosphates (dATP, dCTP, dGTP, and dTTP; collectively referred  
54 to as dNTPs hereafter) are present in the cells of all living beings, functioning as DNA  
55 precursors. Indeed, a continuous input of dNTPs is required for replication, repair, and  
56 recombination of the nuclear, mitochondrial, and chloroplastic (in photosynthetic  
57 organisms) genomes. Two dNTP synthesis pathways have been described in all  
58 eukaryotes and most prokaryotes: the *de novo* and salvage (recycling) pathways  
59 (Kilstrup et al., 2005; Guarino et al., 2014; Witte and Herde, 2020). In eukaryotes, the  
60 limiting step of the *de novo* pathway is catalyzed by RIBONUCLEOTIDE REDUCTASE  
61 (RNR), which consists of two R1 (also called  $\alpha$ ) major subunits and two R2 ( $\beta$ ) minor  
62 subunits (Jordan and Reichard, 1998). Transcription of the genes encoding RNR  
63 subunits is activated in the S phase of the cell cycle, as well as in response to DNA  
64 damage (Guarino et al., 2014).

65 In *Arabidopsis thaliana* (hereafter, *Arabidopsis*), the RNR R1 subunit is encoded  
66 by a single gene: *RNR1*, also known as *CRINKLED LEAVES 8 (CLS8)*; Garton et al.,  
67 2007) and *DEFECTIVE IN POLLEN ORGANELLE DNA DEGRADATION 2 (DPD2)*; Tang  
68 et al., 2012). In the *cls8-1* mutant, the first two leaves are yellowish, and the remaining  
69 leaves are wrinkled with irregular, whitish margins; the flowers are asymmetrical, with  
70 wrinkled petals (Garton et al., 2007). Three paralogous genes encode the RNR R2  
71 subunit in *Arabidopsis*: *TSO MEANING 'UGLY' IN CHINESE 2 (TSO2)*, *RNR2A*, and  
72 *RNR2B*; TSO2 is the major contributor to RNR function. In the *tso2-1* mutant, leaves  
73 from the fifth and subsequent nodes display whitish areas and irregular margins. Some  
74 *tso2-1* plants also show fasciated stems, homeotic transformations of floral organs, and  
75 reduced fertility. Although the *nr2a-1* and *nr2b-1* single mutants and the *nr2a-1 nr2b-*  
76 *1* double mutant appear phenotypically wild type, *tso2-1 nr2a-1* and *tso2-1 nr2b-1* are  
77 lethal (Wang and Liu, 2006), providing evidence for the functional redundancy of TSO2  
78 with RNR2A and RNR2B. As expected, dNTP levels are substantially reduced in the  
79 *cls8-1* and *tso2-1* mutants due to their loss of RNR activity (Wang and Liu, 2006; Garton  
80 et al., 2007).

81 Human Sterile alpha motif and histidine-aspartate domain containing protein 1  
82 (SAMHD1) is a nuclear protein with dGTP-dependent triphosphohydrolase activity,  
83 which, in contrast to RNR, degrades dNTPs into deoxyribonucleosides and inorganic  
84 triphosphate. SAMHD1 harbors a histidine (H) and aspartic acid (D)-rich (HD) domain,  
85 which is required for its dNTPase activity (Aravind and Koonin, 1998), and a Sterile alpha  
86 motif (SAM), whose function is unclear but might help stabilize SAMHD1 during antiviral  
87 activity (Stillman, 2013; Shigematsu et al., 2014; Mauney and Hollis, 2018). Mutations in  
88 *SAMHD1* have been associated with Aicardi-Goutières syndrome, a congenital

89 neurodegenerative autoimmune disorder with early childhood onset and symptoms  
90 similar to those of a congenital viral infection (Goldstone et al., 2011; Powell et al., 2011;  
91 Kretschmer et al., 2015). *SAMHD1* appears to also be involved in defense against  
92 viruses, as it degrades dNTPs following infection by human immunodeficiency virus  
93 (HIV), thus hindering the reverse transcription of the viral genome (Kretschmer et al.,  
94 2015). Mutations in *SAMHD1* have also been detected in some types of cancer (Li et al.,  
95 2017; Coggins et al., 2020).

96 Putative orthologs of *SAMHD1* have been studied in *Arabidopsis* (*VENOSA4*  
97 [*VEN4*]) and *Oryza sativa* (rice; *STRIPE3* [*ST3*]), and are related to chloroplast and leaf  
98 development, stress responses, and dNTP metabolism (Yoshida et al., 2018; Xu et al.,  
99 2020; Wang et al., 2022). *VEN4* hydrolyzes dGTP to 2'-deoxyguanosine (2'-dG) *in vitro*  
100 and positively regulates plant immunity (Lu et al., 2022). Here, to further explore the roles  
101 of *VEN4* and its genetic interactions and possible involvement in dNTP metabolism, we  
102 studied three *ven4* allelic mutants. Our analysis of these mutants, particularly the original  
103 *ven4-0* point mutation, revealed a high degree of cross-kingdom functional conservation  
104 between *Arabidopsis VEN4* and its likely human ortholog *SAMHD1*.

## 105 **MATERIALS AND METHODS**

### 106 **Plant materials, growth conditions, and genotyping**

107 The *Arabidopsis thaliana* (L.) Heynh. wild-type accessions Col-0 and Ler and the *ven4-*  
108 2 (SALK\_077401), *ven4-3* (SALK\_131986), *mr2a-2* (SALK\_150365), and SALK\_121024  
109 mutants in the Col-0 genetic background were obtained from the Nottingham Arabidopsis  
110 Stock Centre (NASC). The *ven4-0* mutant in the Ler background was isolated in the  
111 laboratory of J.L. Micol and was previously described as *ven4* (Berná et al., 1999; Robles  
112 and Micol, 2001; Bensmihen et al., 2008; Pérez-Pérez et al., 2011). Seeds of *tso2-1* (in  
113 the Ler background) were kindly provided by Zhongchi Liu (University of Maryland,  
114 College Park, MD, USA), and *dov1* seeds (in the En-2 background) by Kevin Pyke  
115 (University of Nottingham, Sutton Bonington, Leicestershire, UK). Plants were grown  
116 under sterile conditions on half-strength Murashige and Skoog (MS; Duchefa Biochemie)  
117 medium containing 0.7% plant agar (Duchefa Biochemie) and 1% sucrose (Duchefa  
118 Biochemie) at 20°C ± 1°C, 60-70% relative humidity, and under continuous fluorescent  
119 light of ≈75 μmol/m<sup>2</sup>·s and crossed as previously described (Ponce et al., 1998; Berná  
120 et al., 1999). Unless otherwise stated, all plants used were homozygous for the mutations  
121 indicated. Mapping of *ven4-0* and genotyping of single and double mutants was made  
122 by PCR amplification and/or Sanger sequencing using the primers described in  
123 Supplementary Tables S1 and S2.

124

### 125 **Phenotypic and morphometric analyses and microscopy**

126 Rosettes, siliques, stems, and inflorescences were photographed using a Leica MZ6  
127 stereomicroscope equipped with a Nikon DXM1200 digital camera. Light microscopy,  
128 confocal imaging, and transmission electron microscopy were performed as previously  
129 described (Quesada et al., 2011). The NIS Elements AR 3.1 image analysis package  
130 (Nikon) was used to measure rosette area and hypocotyl length. Main stem length was  
131 measured with a ruler.

132

### 133 **Chlorophyll concentration, photosynthetic efficiency, and fresh and dry weight** 134 **measurements**

135 Chlorophyll concentration in μg per ml of plant extract was measured as previously  
136 described (Lichtenthaler and Wellburn, 1983), as [chlorophyll a] = 12.21·A<sub>663</sub> - 2.81·A<sub>646</sub>,  
137 and [chlorophyll b] = 20.31·A<sub>646</sub> - 5.03·A<sub>663</sub>. The chlorophyll content was then  
138 recalculated on a plant fresh-weight basis as μg of chlorophyll a or b per mg of plant  
139 fresh weight (μg/mg). Photosynthetic yield was measured in the central region of the  
140 lamina of the third-node leaf of each seedling using a DUAL-PAM-100 portable  
141 chlorophyll fluorometer (WALZ, Effeltrich, Germany) immediately after 30 min of dark

142 adaption. The fresh weights of the seedlings were measured immediately after collection,  
143 and dry weights were measured after drying overnight in an oven at 55°C.

144

### 145 **Construction of transgenic lines**

146 For transgenic complementation of the *ven4-0*, *ven4-2*, and *ven4-3* mutations, a 7-kb  
147 region extending from the nucleotide 3,416 upstream of the translation start codon to the  
148 last nucleotide of the 3'-UTR of *VEN4* was PCR amplified using the primer pair  
149 *VEN4*<sub>pro</sub>:*VEN4*\_F/R (Supplementary Table S2). The PCR amplification products were  
150 cloned into the pGreenII0179 vector (Hellens et al., 2000) after restriction with *NotI* and  
151 *SalI* and ligation with T4 ligase (Fermentas).

152 To obtain the *VEN4*<sub>pro</sub>:*GUS* and *35S*<sub>pro</sub>:*VEN4*:*GFP* constructs, the 3,416-bp  
153 genomic region upstream of the translation start codon of *VEN4* or the full-length coding  
154 sequence of *VEN4* (with the translation stop codon removed to obtain GFP translational  
155 fusions) was PCR amplified with primer pairs *VEN4*<sub>pro</sub>:*GUS*\_F/R and  
156 *35S*<sub>pro</sub>:*VEN4*:*GFP*\_F/R, respectively, as described in Supplementary Table S2. The  
157 PCR amplification products were cloned into the pENTR/D-TOPO Gateway entry vector  
158 (Invitrogen) via BP reactions. The *VEN4*<sub>pro</sub> and *VEN4* (without its stop codon) inserts of  
159 the entry clones were subcloned into the pMDC164 and pMDC83 destination vectors,  
160 respectively, via LR reactions (Curtis and Grossniklaus, 2003).

161 Chemically competent *Escherichia coli* DH5α cells were transformed by the heat-  
162 shock method with the ligation products or the BP and LR reaction mixes. The integrity  
163 of the transgenes was verified by Sanger sequencing of at least two independent  
164 transformant clones. *Agrobacterium tumefaciens* LBA4404 cells were transformed by  
165 electroporation with the verified constructs. The transgenes were transferred into Col-0  
166 (*VEN4*<sub>pro</sub>:*GUS* and *35S*<sub>pro</sub>:*VEN4*:*GFP*) or *ven4-0*, *ven4-2*, and *ven4-3* plants  
167 (*VEN4*<sub>pro</sub>:*VEN4*) by the floral dip method (Clough and Bent, 1998). The *ven4-0* and *ven4-*  
168 *2* mutants were crossed to Col-0 *35S*<sub>pro</sub>:*VEN4*:*GFP* plants, and 8 F<sub>2</sub> Hyg<sup>R</sup> plants were  
169 genotyped to identify *ven4* homozygotes carrying at least a single copy of the transgene.

170

### 171 **RNA isolation, RT-PCR, and RT-qPCR**

172 For gene expression analysis, RNA was isolated from the aerial parts of plants collected  
173 15 or 21 days after stratification (das) using TRIzol (Invitrogen). cDNA synthesis and  
174 PCR amplifications were carried out as previously described (Wilson-Sánchez et al.,  
175 2018). qPCR amplification was carried out in a Step-One Real-Time PCR System  
176 (Applied Biosystems), with three technical replicates per biological replicate (each  
177 consisting of three rosettes). The primers used are described in Supplementary Table  
178 S2. The housekeeping gene *ACTIN2* (*ACT2*) was used as an internal control for relative

179 quantification, as previously described (Wilson-Sánchez et al., 2018). The  $C_T$  values  
180 were normalized using the  $2^{-\Delta\Delta C_T}$  method (Livak and Schmittgen, 2001).

181

## 182 **Metabolite profiling**

183 Third- and fourth-node leaves were collected 21 das from at least six biological replicates  
184 of *ven4-0* and *Ler* plants. Metabolite profiling was performed by GC-MS as previously  
185 described (Lisec et al., 2006). Targeted metabolite identification was performed using  
186 the TargetSearch Bioconductor package (Cuadros-Inostroza et al., 2009) with a library  
187 based on approximately 900 reference compounds from the GMD database (Kopka et  
188 al., 2005; Schauer et al., 2005). Only compounds with a retention index (RI) deviation of  
189  $<2000$  and an identification based on at least five matching correlated masses were  
190 retained. Redundant metabolites were either removed or grouped to retain the most likely  
191 identification, and other potential hits were noted. Metabolites with significant differences  
192 between *Ler* and *ven4-0* were identified based on a Student's *t*-test.

193

## 194 **Protein structure visualization and analysis**

195 The 3D structures of the full-length monomers of VEN4 and human SAMHD1 were  
196 downloaded from the AlphaFold Protein Structure Database (AlphaFold DB; Jumper et  
197 al., 2021; Varadi et al., 2021; <https://alphafold.ebi.ac.uk>; in this database, VEN4 and  
198 human SAMHD1 are identified as AF-Q9FL05-F1 and AF-Q9Y3Z3-F1, respectively) and  
199 visualized using the UCSF ChimeraX 1.2.5 software (Goddard et al., 2018; Pettersen et  
200 al., 2021; <https://www.rbvi.ucsf.edu/chimerax/>).

201 To analyze the impact of the E249L substitution on the conformational stability  
202 and dynamics of VEN4 and the equivalent E355L mutation in human SAMHD1, we used  
203 two web structure-based protein stability predictors: DynaMut (Rodrigues et al., 2018;  
204 <https://biosig.lab.uq.edu.au/dynamut/>) and DynaMut2 (Rodrigues et al., 2021;  
205 <https://biosig.lab.uq.edu.au/dynamut2/>). These predictors quantify the difference in the  
206 unfolding Gibbs free energy between wild-type and mutant proteins ( $\Delta\Delta G$ , expressed in  
207 kcal/mol) and classify mutations as stabilizing when  $\Delta\Delta G > 0$  kcal/mol or destabilizing  
208 when  $\Delta\Delta G < 0$  kcal/mol. DynaMut also offers the  $\Delta\Delta G$  results from three additional  
209 predictors: SDM (Worth et al., 2011), mCSM (Pires et al., 2014b), and DUET (Pires et  
210 al., 2014a), as well as the difference in the vibrational entropy energy between wild-type  
211 and mutant proteins ( $\Delta\Delta S_{\text{vib}}$ , expressed in kcal/mol/K), as computed by the ENCoM  
212 server (Frappier et al., 2015), which classifies mutations as rigidifying if  $\Delta\Delta S_{\text{vib}} > 0$   
213 kcal/mol/K, or flexibilizing when  $\Delta\Delta S_{\text{vib}} < 0$  kcal/mol/K. Finally, we used Missense3D  
214 (Ittisoponpisan et al., 2019; <http://missense3d.bc.ic.ac.uk/missense3d/>) to predict  
215 damaging structural effects on VEN4 and human SAMHD1 proteins upon E249L and

216 E355L substitutions, respectively.

217

218 **Accession numbers**

219 Sequence data from this article can be found at TAIR (<http://www.arabidopsis.org>) under  
220 the following accession numbers: *VEN4* (At5g40270), *VEN4* paralog (At5g40290), *RNR1*  
221 (At2g21790), *TSO2* (At3g27060), *RNR2A* (At3g23580), *RNR2B* (At5g40942), *DOV1*  
222 (At4g34740), and *ACT2* (At3g18780).



## 223 RESULTS

### 224 Positional cloning of the *ven4-0* mutation

225 A number of Arabidopsis mutants exhibit rosette leaf reticulation, with some, most, or all  
226 veins green but the interveinal tissues pale. This phenotype is usually due to a reduced  
227 number of interveinal mesophyll cells and/or alterations in chloroplast development,  
228 which result in locally reduced contents of chlorophylls and other photosynthetic  
229 pigments (reviewed in Lundquist et al., 2014). In a large-scale screening for ethyl  
230 methanesulfonate (EMS)-induced Arabidopsis mutants with abnormal leaf shape, size  
231 or pigmentation (Berná et al., 1999), we previously isolated hundreds of viable mutants,  
232 some of which were named *venosa* (*ven*) since they exhibited reticulated rosette leaves.  
233 One such mutation, named *ven4* (referred to here as *ven4-0*), is recessive and fully  
234 penetrant (Berná et al., 1999), has only mild effects on whole leaf shape (Bensmihen et  
235 al., 2008), and increases the number of stomata in leaves (Pérez-Pérez et al., 2011).

236 We subjected the *ven4-0* mutation, which was isolated in the Ler background  
237 (Figure 1A, B), to iterative linkage analysis using molecular markers, finding that the  
238 At5g40270 gene was the best candidate to be *VEN4* (Figure 2). We crossed *ven4-0*  
239 (Figure 1B) to two lines harboring T-DNA insertions in At5g40270: SALK\_077401 and  
240 SALK\_131986 (in the Col-0 background; Figure 1C-E). Non-complementation was  
241 observed in the F<sub>1</sub> plants of these crosses, confirming that At5g40270 is *VEN4*. We  
242 initially named these two lines *ven4-2* and *ven4-3*, respectively (Supplementary Figure  
243 S1). We later found that *phyB-9*, an extensively studied mutant line assumed to carry  
244 only a mutant allele of *PHYTOCHROME B* (*PHYB*), also harbors a mutant allele of *VEN4*,  
245 which we referred to as *bnen* in Yoshida et al. (2018); we also stated that *ven4-2* and  
246 *bnen* are alleles of *VEN4*. We mentioned in that paper that we already identified  
247 At5g40270 as *VEN4* and indicated that we would describe its identification and the  
248 analysis of other *ven4* alleles elsewhere.

249 During the course of the current study, Xu et al. (2020) proposed that *VEN4* is  
250 involved in dNTP metabolism based on (1) structural homology with human SAMHD1  
251 and (2) the finding that treatment with dNTPs partially rescued the phenotypes of two T-  
252 DNA-insertional *ven4* mutants. The authors named the *VEN4* allele carried by the  
253 SALK\_023714 line *ven4-1* (which we did not examine here) and the *VEN4* allele carried  
254 by the SALK\_077401 line *ven4-2* (as also described in Yoshida et al., 2018). Hence, to  
255 avoid confusion, we introduce the names *ven4-0* to describe the EMS-induced allele that  
256 we previously referred to as *ven4* since 1999 (Berná et al., 1999; Robles and Micol,  
257 2001; Bensmihen et al., 2008; Pérez-Pérez et al., 2011) and *ven4-3* for SALK\_131986.  
258 The other alleles are referred to as previously named: *ven4-1* for SALK\_023714 (Xu et  
259 al., 2020; Lu et al., 2022) and *ven4-2* for SALK\_077401 (Yoshida et al., 2018; Xu et al.,

260 2020; Lu et al., 2022).

261 Sanger sequencing of the *ven4-0* allele revealed a G→A transition (Figure 2B  
262 and Supplementary Table S2) that is predicted to cause an E249L missense substitution  
263 in the protein encoded by At5g40270. RT-qPCR revealed extremely low levels of *ven4-*  
264 *2* transcripts, including sequences downstream of its T-DNA insertion, suggesting that  
265 this allele is nearly null (its  $2^{-\Delta\Delta C_T}$  is  $96 \cdot 10^{-4}$  fold that of Col-0).

266

267 ***ven4-0* exhibits stronger leaf defects compared to its T-DNA-insertional *ven4***  
268 **alleles**

269 The mutant morphological phenotype of *ven4-0* (Supplementary Table S3) was stronger  
270 than those of *bnen* (Yoshida et al., 2018), *ven4-1* (Xu et al., 2020) and *ven4-2* (Yoshida  
271 et al., 2018; this work). Similarly, the reductions in chlorophyll contents and  
272 photosynthetic efficiency were more pronounced in *ven4-0* plants (Supplementary Table  
273 S4). The leaf internal structure was similar in *ven4-0* and *Ler* (Figure 1F, G), but the  
274 mutant had smaller chloroplasts in the palisade mesophyll cells, as revealed by  
275 transmission electron microscopy (Figure 1H, I); this phenotype was previously observed  
276 in the *bnen* mutant (Yoshida et al., 2018). In addition, *ven4-0* chloroplasts exhibited an  
277 increased number of plastoglobules, reduced number of starch granules, and poorly  
278 organized thylakoids compared to *Ler* (Figure 1H, I). In agreement with the aberrant  
279 chloroplast development exhibited by *ven4* mutants, the *ven4-1* mutant exhibits  
280 markedly reduced levels of photosynthetic proteins (Xu et al., 2020). Finally, the leaf  
281 paleness of *ven4* mutants is a temperature-sensitive trait: growth at 26°C restored leaf  
282 color in *ven4-0*, *ven4-2*, and *ven4-3* to wild-type levels (Supplementary Figure S2). This  
283 result is also in agreement with the recovery of photosynthetic activity observed when  
284 *bnen* and *ven4-1* were shifted from 22°C to 32°C (Xu et al., 2020).

285 VEN4 is thought to play an important role in leaf chloroplast development mainly  
286 following leaf emergence (Xu et al., 2020). However, under our growth conditions, GUS  
287 activity in five independent lines carrying the *VEN4<sub>pro</sub>:GUS* transgene was highest in  
288 emerging leaves and decreased with leaf expansion (Figure 3A), pointing to a  
289 photosynthesis-independent function of VEN4. We observed high *VEN4* promoter  
290 activity in emerging leaves and developing flowers, suggesting that VEN4 functions in  
291 highly proliferative tissues (Figure 3C, E). We also detected GUS staining in the stem  
292 and root vasculature (Figure 3B, D).

293 We confirmed the identity of *VEN4* by transforming *ven4-0*, *ven4-2*, and *ven4-3*  
294 with a transgene containing a 7,364-bp Col-0 genomic DNA fragment including the  
295 At5g40270 coding region (4,209 bp) and its putative promoter; this *VEN4<sub>pro</sub>:VEN4*  
296 transgene fully rescued the mutant phenotypes of *ven4-0*, *ven4-2*, and *ven4-3* plants

297 (Supplementary Figure S3A-F). In addition, the expression of  $35S_{pro}:VEN4:GFP$  fully  
298 restored the wild-type phenotypes of *ven4-0* and *ven4-2* (Supplementary Figure S3G-J).  
299 In these transgenic plants, VEN4 localized to the nucleoplasm of apical root cells in a  
300 diffuse pattern (Figure 3F-H), like human SAMHD1 (Kretschmer et al., 2015). These  
301 results confirm previous findings from Xu et al. (2020), which were obtained by transient  
302 transgene expression in Arabidopsis leaf protoplasts.

303

### 304 **The mutant VEN4-0 protein is predicted to be more rigid than wild-type VEN4**

305 The morphological phenotype caused by the *ven4-0* point mutation is stronger than those  
306 of the T-DNA insertional *ven4* alleles. To explore the molecular basis of such differences  
307 in phenotypic strength, we compared the 3D structures of full-length VEN4 and human  
308 SAMHD1 proteins from AlphaFold DB (Jumper et al., 2021; Varadi et al., 2021;  
309 <https://alphafold.ebi.ac.uk/>).

310 The dNTPase activity of human SAMHD1 is regulated by the combined action of  
311 GTP and all four dNTPs, with which SAMHD1 assembles into functional tetramers. When  
312 dATP binds to allosteric site 2 of SAMHD1 (N119, D330, N358, and R372), E355 moves,  
313 enabling the establishment of a salt bridge with the R333 residue, which stabilizes the  
314 bound dATP via a stacking interaction (Ji et al., 2013; Ji et al., 2014). SAMHD1 R333  
315 appears to be equivalent to VEN4 R231, which is also close enough to E249 (the residue  
316 affected by the *ven4-0* mutation) to form a salt bridge, as shown by our 3D-structural  
317 prediction (Figure 4B).

318 To assess the potential effects of the *ven4-0* mutation (E249L) on the structural  
319 stability and dynamics of VEN4-0, we predicted differences in the unfolding Gibbs free  
320 energy ( $\Delta\Delta G$ ) and vibrational entropy energy ( $\Delta\Delta S_{vib}$ ) between the wild-type and mutant  
321 proteins using DynaMut (Rodrigues et al., 2018) and DynaMut2 (Rodrigues et al., 2021).  
322 Both servers estimated positive  $\Delta\Delta G$  values indicating that E249L is a stabilizing  
323 mutation (Supplementary Table S5). A negative  $\Delta\Delta S_{vib}$  value was also calculated by  
324 ENCoM (Frappier et al., 2015), pointing to the possible rigidification of the 3D structure  
325 of VEN4-0 compared to VEN4 (Supplementary Table S5 and Supplementary Figure  
326 S4A). We also conducted this analysis simulating an equivalent E355L mutation in  
327 human SAMHD1, which revealed that this mutation would also stabilize and rigidify the  
328 structure of SAMHD1 (Supplementary Table S5 and Supplementary Figure S4B).

329 We used Missense3D (Ittisoponpisan et al., 2019) to predict the damaging effects  
330 of the E249L change on VEN4-0 structure compared to VEN4 and the effects of the  
331 equivalent E355L change in SAMHD1. No structural damage was predicted by  
332 Missense3D for the E249L substitution of VEN4-0 based on changes in solvent  
333 exposure; indeed, residue 249 is exposed to solvents in a similar manner with (L249)

334 and without (E249) the mutation. Nevertheless, when we compared the 3D structures of  
335 wild-type and mutant proteins, we observed changes in the side chain angles of some  
336 residues in the vicinity of the mutated amino acid (Figure 4A). We also detected the loss  
337 of two hydrogen bonds between E249 and S252, as well as the salt bridge between E249  
338 and R231, whose impact was not predicted by the software mentioned above (Figure  
339 4B, C). By contrast, Missense3D classified the equivalent E355L substitution in human  
340 SAMHD1 as structurally damaging due to the replacement of a buried negative charge,  
341 as well as the disruption of two buried hydrogen bonds and the salt bridge between the  
342 E355 and R333 residues (Supplementary Figure S5B, C). The overlay of wild-type and  
343 mutant proteins also showed differences in the side chain angles of neighboring amino  
344 acids, including R333, which is located close to E355 in the secondary but not the primary  
345 structure of SAMHD1 (Supplementary Figure S5A).

346

#### 347 **The *ven4-0* and *dov1* mutations genetically interact and cause opposite amino acid** 348 **profiles**

349 In some *Arabidopsis* reticulated mutants, such as *differential development of vascular*  
350 *associated cells 1 (dov1)*, leaf veins appear green because the perivascular bundle  
351 sheath cells are apparently normal. The remaining mesophyll tissue shows increased  
352 numbers of air spaces and a reduced number of cells, which are malformed and, in some  
353 cases, contain morphologically aberrant chloroplasts. *DOV1* encodes glutamine  
354 phosphoribosyl pyrophosphate aminotransferase 2 (ATase2), which catalyzes the first  
355 step of purine nucleotide biosynthesis within the chloroplast (Rédei and Hirono, 1964; Li  
356 et al., 1995; Kinsman and Pyke, 1998; Mollá-Morales et al., 2011; Rosar et al., 2012).  
357 Indeed, some steps of purine and pyrimidine biosynthesis take place in chloroplasts and  
358 require several amino acids as substrates. In the *dov1* mutant, the levels of glycine,  
359 alpha-alanine, proline, asparagine, aspartate, lysine, the asparagine precursor ornithine,  
360 and inorganic phosphate are significantly increased (Hung et al., 2004).

361 To determine whether the functions of *VEN4* and *DOV1* are related, we  
362 generated *ven4-0 dov1* and *ven4-2 dov1* double mutants, which exhibited a synergistic  
363 phenotype: their growth was slow, and their leaves were small, irregularly shaped, and  
364 accumulated anthocyanins (Figure 5A, B, D, G, H). We then performed a metabolomic  
365 analysis of *ven4-0* and *Ler*. The amino acid profile of *ven4-0* was opposite to that  
366 published for *dov1* in terms of the levels of glycine, proline, and asparagine. We also  
367 detected reduced levels of other amino acids: glutamine, phenylalanine, tyrosine, valine,  
368 beta-alanine, methionine, cysteine, and arginine (Figure 6 and Supplementary Table  
369 S6). Four of these amino acids are related to different steps of dNTP biosynthesis:  
370 glutamine is a precursor of both purines and pyrimidines; glycine is a specific precursor

371 of purines; arginine biosynthesis shares intermediates with pyrimidine *de novo*  
372 biosynthesis; and beta-alanine is a product of uridine catabolism (Witte and Herde,  
373 2020).

374

#### 375 **VEN4 genetically interacts with TSO2**

376 To further study the possible involvement of VEN4 in dNTP metabolism, we crossed  
377 *ven4-0* and *ven4-2* with plants mutated in the genes encoding RNR2: *tso2-1* and  
378 SALK\_150365 (which carries an insertional allele of the *RNR2A* gene; we named this  
379 mutant *rnr2a-2*). Most (92.3%) *ven4-0 tso2-1* double mutants displayed lethality: 58.1%  
380 of seeds did not germinate, and 34.2% germinated but gave rise to slow-growing, callus-  
381 like speckled green seedlings, which produced many leaves and did not bolt (Figure 5A,  
382 C, E, M; and Supplementary Figure S6). Only 7.7% of *ven4-0 tso2-1* seeds developed  
383 viable plants. These plants produced few leaves, short stems, aberrant flowers, and  
384 siliques containing mostly unfertilized ovules or arrested embryos, but also a few viable  
385 seeds (Figure 5O, P, Q; and Supplementary Figure S6). The viability of *ven4-2 tso2-1*  
386 seeds was similar to that of *ven4-0 tso2-1* seeds: 66.2% did not germinate, 29.4%  
387 developed callus-like seedlings, and only 4.45% gave rise to viable plants with aberrant  
388 flowers and siliques (Figure 5B, C, F, N, O, P, Q; and Supplementary Figure S6).

389 Furthermore, the *ven4-0/ven4-0;TSO2/tso2-1* and *ven4-2/ven4-2;TSO2/tso2-1*  
390 sesquimutants showed stronger depigmentation and smaller rosettes compared to the  
391 *ven4-0* or *ven4-2* single mutants (Figure 5A, B, I, J). However, *VEN4/ven4-0;tso2-1/tso2-*  
392 *1* and *VEN4/ven4-2;tso2-1/tso2-1* plants were indistinguishable from the *tso2-1* single  
393 mutant (Figure 5C, K, L). These unequal phenotypes exhibited by the reciprocal  
394 sesquimutants suggest that TSO2 plays a more important role in dNTP metabolism than  
395 VEN4. In contrast to the almost completely lethal phenotype of *ven4 tso2-1* plants, the  
396 *ven4-0 rnr2a-2* and *ven4-2 rnr2a-2* double mutants were viable, and their morphological  
397 phenotypes and chlorophyll levels were similar to those of *ven4-0* plants, although both  
398 double mutants were smaller than the parental lines (Supplementary Figure S7). The  
399 strong differences in the phenotypes of the *ven4 tso2-1* and *ven4 rnr2a-2* double mutants  
400 support the notion that TSO2 contributes more strongly to RNR function than RNR2A,  
401 as previously described (Wang and Liu, 2006).

402

#### 403 **The At5g40290 paralog of VEN4 is likely a pseudogene**

404 *VEN4* (At5g40270) and At5g40290 encode proteins of 448 and 473 amino acids,  
405 respectively, which share 82% identity; these two proteins are considered in  
406 HomoloGene to be the co-orthologs of human SAMHD1  
407 (<https://www.ncbi.nlm.nih.gov/homologene/9160>). The *VEN4* and At5g40290 genes are

408 separated by only 8 kb, which suggests a recent gene duplication; only *VEN4* has been  
409 studied at some level (Pérez-Pérez et al., 2011; Yoshida et al., 2018; Xu et al., 2020; Lu  
410 et al., 2022). Plants of the SALK\_121024 insertional line that were homozygous for a T-  
411 DNA insertion interrupting the coding region of At5g40290 (Figure 7B) were  
412 phenotypically wild type. This observation, together with the apparent absence of UTRs  
413 in this gene, as well as the lack of annotated ESTs in The Arabidopsis Information  
414 Resource (TAIR; <https://www.arabidopsis.org>), suggest that At5g40290 is a  
415 pseudogene. In agreement with this hypothesis, the At5g40290 transcript is considered  
416 to be undetectable in almost all tissues based on data in the Transcriptome Variation  
417 Analysis (TraVA; <http://travadb.org/>) and Arabidopsis THaliana ExpressioN Atlas  
418 (ATHENA; [http://athena.proteomics.wzw.tum.de:5002/master\\_arabidopsisshiny/](http://athena.proteomics.wzw.tum.de:5002/master_arabidopsisshiny/))  
419 databases and is expressed at 10-fold lower levels than *VEN4* based on data in the  
420 Arabidopsis eFP Browser database (<https://bar.utoronto.ca/efp/cgi-bin/efpWeb.cgi>). The  
421 latter data, however, are based on microarray analyses performed using the 249399\_at  
422 and 249403\_at probes of the GeneChip Arabidopsis Genome ATH1 Array (Thermo  
423 Fisher Scientific). These probes are 25-nucleotides long and contain 23 nucleotides that  
424 are complementary to *VEN4* (249399\_at) or At5g40290 (249403\_at) mRNA, suggesting  
425 that it is not possible to distinguish the expression of these two genes using any of these  
426 probes (Figure 7A). In the most updated version of eFP-Seq Browser  
427 ([https://bar.utoronto.ca/eFP-Seq\\_Browser/](https://bar.utoronto.ca/eFP-Seq_Browser/)), which also includes data from different  
428 RNA-seq experiments, At5g40290 has been annotated as almost not expressed, with 0  
429 to 1.88 reads per kilobase of transcript per million mapped reads (RPKM). Meanwhile,  
430 *VEN4* has RPKM values ranging from 0.1 to 19.45 in this database.

431 Finally, to determine whether At5g40290 is actually transcribed, we amplified  
432 cDNA from Col-0 and *ven4-2* leaves via PCR using two pairs of specific primers designed  
433 to avoid complementarity between their 3' ends and *VEN4* (Supplementary Table S2 and  
434 Figure 7B, C). No amplification was observed from Col-0 or *ven4-2* cDNA, indicating that  
435 At5g40290 is not expressed, at least at the developmental stage studied: 15 das under  
436 our growth conditions. Moreover, this gene did not appear to be induced in the null *ven4-2*  
437 background (Figure 7D).

## 438 DISCUSSION

439 In most *Arabidopsis* mutants with reticulate leaves, the leaf vascular network can be  
440 clearly distinguished as a green reticulation on a paler lamina. This easily visible  
441 phenotype usually reveals alterations in internal leaf architecture, which are often  
442 associated with altered chloroplast biogenesis. Most genes that have been studied  
443 because their mutations cause leaf reticulation are nuclear and encode proteins that  
444 function within the chloroplast (reviewed in Lundquist et al., 2014). We previously studied  
445 some of these mutations, including *reticulata* (*re*, some of which we initially named *ven2*;  
446 González-Bayón et al., 2006), *reticulata-related 3* (*rer3*, which we initially named *ven5*;  
447 Pérez-Pérez et al., 2013), *ven3* and *ven6* (Mollá-Morales et al., 2011), and *scabra3*  
448 (*sca3*; Hricová et al., 2006). *RE* and its paralog *RER3* are proteins of unknown function  
449 containing a DUF3411 domain. Mutations in *RE* have long been known to cause  
450 differential development of chloroplasts in bundle sheath and mesophyll cells (Kinsman  
451 and Pyke, 1998). *VEN3* and *VEN6* encode subunits of carbamoyl phosphate synthetase,  
452 an enzyme involved in arginine biosynthesis within the chloroplasts, and *SCA3* encodes  
453 the plastid RNA polymerase RpoTp.

454 We previously isolated the *re-3* (*ven2-1*), *re-4* (*ven2-2*), *rer3* (*ven5*), *ven3*, *ven6*,  
455 *sca3*, and *ven4-0* mutants in a screen for leaf mutants (Berná et al., 1999). We  
456 determined that *VEN4* is the At5g40270 gene (Yoshida et al., 2018; this work), which,  
457 since 2006, is annotated at TAIR (<https://www.arabidopsis.org>) as encoding a HD  
458 domain-containing metal-dependent phosphohydrolase family protein of unknown  
459 function; human SAMHD1 is a well-known member of this family (Coggins et al., 2020).  
460 Xu et al. (2020) proposed that *VEN4* is involved in dNTP metabolism based on its  
461 structural similarity with SAMHD1 and the finding that growth in medium supplemented  
462 with dNTPs partially rescued the phenotypes of two T-DNA insertional *ven4* mutants. A  
463 recent study demonstrated a role for *VEN4* in immune responses linked to dNTP  
464 metabolism: *VEN4* hydrolyzes dGTP to produce 2'-dG, a novel immune signaling  
465 molecule that accumulates in plants after bacterial pathogen infection; consequently,  
466 *ven4-1* and *ven4-2* exhibit reduced levels of 2'-dG and hypersensitivity to bacterial  
467 pathogens (Lu et al., 2022).

468 As expected based on a role for *VEN4* in dNTP metabolism, and therefore from  
469 its functional conservation with human SAMHD1, here we demonstrated that the  
470 morphological and physiological phenotypes of the *ven4* mutants are similar to those of  
471 mutant alleles of two other genes known to be required for dNTP metabolism: *CLS8* and  
472 *DOV1*. *CLS8* is the R1 subunit of RNR, a key enzyme in the *de novo* dNTP biosynthesis  
473 pathway. *DOV1* is the enzyme that catalyzes the first step of the *de novo* biosynthesis  
474 of purines. In addition, the lethality displayed by the *ven4-0 tso2-1* and *ven4-2 tso2-1*

475 double mutants, and the extremely aberrant phenotype of the *ven4-0/ven4-0;TSO2/tso2-*  
476 *1* and *ven4-2/ven4-2;TSO2/tso2-1* sesquimutants, strongly suggest a functional  
477 relationship between VEN4 and TSO2, the major contributor to the activity of the R2  
478 subunit of RNR.

479 The synergistic phenotypes of the *ven4-0 dov1* and *ven4-2 dov1* double mutants  
480 provide further genetic evidence for the role of VEN4 in dNTP metabolism. In addition,  
481 our metabolomic analysis of the *ven4-0* mutant revealed a reduction in the levels of most  
482 amino acids, several of which are precursors of purine and pyrimidine biosynthesis. This  
483 behavior is opposite to that observed in the *dov1* mutant (Rosar et al., 2012), which  
484 shows reduced levels of purine nucleotides and increased levels of amino acid  
485 precursors of purine biosynthesis (Hung et al., 2004; Rosar et al., 2012). The observed  
486 reduction in amino acid levels in *ven4-0* (like in *dov1*) could perhaps be explained by the  
487 connection between dNTP metabolism and amino acid homeostasis, as both metabolic  
488 processes share intermediates, and some amino acids are precursors in dNTP synthesis  
489 (Witte and Herde, 2020).

490 On the other hand, a long alpha helix (from R352 to A373) of human SAMHD1  
491 allows this protein to undergo interactions that are crucial for protein tetramerization and  
492 dNTPase activity (Ji et al., 2013). When dATP binds to the allosteric site 2 of SAMHD1  
493 (N119, D330, N358, and R372), the E355 residue stabilizes R333 by forming a salt  
494 bridge between their side chains, promoting the stacking of the R333 guanidinium group  
495 with the adenine of dATP (Ji et al., 2014). Interestingly, the E249L change in VEN4-0 in  
496 the *ven4-0* mutant affects the residue equivalent to E355 of SAMHD1. Our *in silico*  
497 predictions of the effects of the E249L missense substitution on conformational stability,  
498 dynamics, and interatomic interactions of VEN4, and those of the equivalent E355L  
499 substitution in SAMHD1, revealed an increase in the stability of both proteins, a  
500 rigidification of their structures in the vicinity of the mutation, and the disruption of the  
501 salt bridge between the side chains of E249 (E355 in SAMHD1) and R231 (R333 in  
502 SAMHD1), which may affect the dNTPase activity of these proteins.

503 We also provide evidence that At5g40290, the closest paralog of *VEN4*, is likely  
504 a pseudogene and that its transcriptional activity described in some databases is likely  
505 an artifact caused by the use of probes that do not allow the expression of these two  
506 genes to be discriminated. In fact, it was very difficult to identify regions from which to  
507 design specific primers that amplify At5g40290 but not *VEN4*. At5g40290 is closely  
508 linked to *VEN4* (At5g4270), which may result from a recent duplication, followed by  
509 pseudogenization.



510 **AUTHOR CONTRIBUTIONS**

511 J.L.M. and M.R.P. conceived and supervised the study, provided resources, and  
512 obtained funding. J.L.M., M.R.P., R.S.-M., V.Q. and V.M. designed the methodology.  
513 R.S.-M., R.G.-B., S.F.-C., M.A.H., E.B.-C. and F.J.A.-M. performed the research. J.L.M.,  
514 M.R.P., R.S.-M. and S.F.-C. wrote the original draft. All authors reviewed and edited the  
515 manuscript.

516

517 **FUNDING**

518 This work was supported by the Ministerio de Ciencia e Innovación of Spain (PGC2018-  
519 093445-B-I00 and PID2021-127725NB-I00 [MCI/AEI/FEDER, UE] to J.L.M. and  
520 PGC2018-093445-B-I00 and PID2020-117125RB-I00 [MCI/AEI/FEDER, UE] to M.R.P.)  
521 and the Generalitat Valenciana (PROMETEO/2019/117, to M.R.P. and J.L.M.).

522

523 **ACKNOWLEDGMENTS**

524 The authors wish to thank J.M. Serrano, M.J. Níguez, and J. Castelló for their excellent  
525 technical assistance, and Zhongchi Liu (University of Maryland, College Park, MD, USA)  
526 and Kevin Pyke (University of Nottingham, Sutton Bonington, Leicestershire, UK) for  
527 providing the seeds of *tso2-1* and *dov1*, respectively. We specially thank Prof. Lothar  
528 Willmitzer for support and encouragement.

529

530 **CONFLICT OF INTEREST**

531 The authors declare that the research was conducted in the absence of commercial or  
532 financial relationships that could be interpreted as a potential conflict of interest.

533

534

535 **SUPPLEMENTARY MATERIAL**

- 536 **Supplementary Figure S1.** Complementation analysis of the *ven4* alleles.
- 537 **Supplementary Figure S2.** Effects of temperature on rosette morphology in the *ven4*  
538 mutants.
- 539 **Supplementary Figure S3.** Transgenic complementation of the phenotypes of the *ven4*  
540 mutants.
- 541 **Supplementary Figure S4.** Predicted effects of the E249L and E355L mutations on the  
542 dynamics of VEN4 and human SAMHD1, respectively.
- 543 **Supplementary Figure S5.** Comparison of the 3D structures of wild-type and E355L  
544 mutant human SAMHD1 proteins.
- 545 **Supplementary Figure S6.** Phenotypic classes of the *ven4-0 tso2-1* and *ven4-2 tso2-1*  
546 double mutants.
- 547 **Supplementary Figure S7.** Morphological phenotypes of the *ven4-0 rnr2a-2* and *ven4-*  
548 *2 rnr2a-2* double mutants.
- 549 **Supplementary Table S1.** Primer pairs used for iterative linkage analysis.
- 550 **Supplementary Table S2.** Other primers used in this work.
- 551 **Supplementary Table S3.** Morphometric analysis of the *ven4* mutants.
- 552 **Supplementary Table S4.** Chlorophyll levels and photosynthetic efficiency in the *ven4*  
553 mutants.
- 554 **Supplementary Table S5.** Predicted effects of the E249L and E355L mutations on the  
555 stability and dynamics of the VEN4 and human SAMHD1 proteins, respectively.
- 556 **Supplementary Table S6.** Metabolite profiling results.

## 557 **FIGURE LEGENDS**

558 **Figure 1.** Morphological and histological phenotypes of the *ven4* alleles examined in this  
559 study. A to E, Rosettes of wild-type *Ler* (A) and *Col-0* (C) and the *ven4-0* (B), *ven4-2* (D),  
560 and *ven4-3* (E) mutants. Photographs were taken 16 days after stratification (das). Scale  
561 bars: 2 mm. F and G, Transverse sections midway along the leaf margin and the primary  
562 vein of *Ler* (F) and *ven4-0* (G) third-node rosette leaves. Scale bars: 40  $\mu$ m. H and I,  
563 Transmission electron micrographs of *Ler* (H) and *ven4-0* (I) chloroplasts. Red arrows in  
564 (I) indicate plastoglobules. Third-node leaves were collected 21 das. Scale bars: 1  $\mu$ m.

565

566 **Figure 2.** Positional cloning and structure of the *VEN4* gene. A, Map-based strategy  
567 used to identify the *VEN4* gene. Using the mapping method described in Ponce et al.  
568 (1999), Robles and Micol (2001) found the *ven4-0* mutation linked to the *AthPHYC*  
569 marker. The linkage analysis of 300 plants from an  $F_2$  mapping population derived from  
570 a cross between *Col-0* and *ven4-0* allowed us to delimit a candidate interval of 100 kb  
571 (encompassing 31 genes). The molecular markers used for linkage analysis (see also  
572 Supplementary Table S1) and the number of informative recombinants identified (in  
573 parentheses) are indicated. To identify *VEN4* among the candidate genes, we searched  
574 for publicly available Salk T-DNA lines (Alonso et al., 2003; <http://signal.salk.edu>)  
575 carrying insertions within the interval. Two of the 33 T-DNA insertional lines that we  
576 tested displayed phenotypic traits similar to those of *ven4-0* plants, and their T-DNA  
577 insertions were shown to disrupt the seventh and eighteenth exons of *At5g40270*,  
578 respectively. PCR amplification and Sanger sequencing confirmed the presence and  
579 positions of the annotated insertions at nucleotide positions 1,583 (from the predicted  
580 translation start codon) in *SALK\_077401* and 3,409 in *SALK\_131986*. A  
581 complementation test demonstrated allelism between *ven4-0* and these two T-DNA lines  
582 (Supplementary Figure S1). The *At5g40270* gene is shown in green and its paralog  
583 *At5g40290* in blue. B, Structure of the *VEN4* gene indicating the positions and nature of  
584 the *ven4* mutations examined in this study and the positions of the RT-qPCR\_VEN4\_F  
585 and RT-qPCR\_VEN4\_R primers (shown as F and R, respectively; see Supplementary  
586 Table S2), which are not drawn to scale. Exons and introns are indicated by boxes and  
587 lines, respectively; filled and open boxes represent coding sequences and untranslated  
588 regions, respectively. Triangles represent T-DNA insertions, and the vertical red arrow  
589 shows the *ven4-0* point mutation. The translation start (ATG) and stop (TGA) codons are  
590 also shown.

591

592 **Figure 3.** Expression pattern of *VEN4* and subcellular localization of *VEN4* in wild-type  
593 *Col-0*. A to E, Visualization of *VEN4<sub>pro</sub>:GUS* transgene activity in rosette (A), root (B),

594 inflorescence (C), stem (D), and flower tissue (E). Seedlings and plant organs were  
595 collected 21 (A and B) and 34 (C, D and E) das. Scale bars: 1 mm (A, C, and E) and 0.5  
596 mm (B and D). F to H, Apical root cells of a  $35S_{pro}:VEN4:GFP$  transgenic plant in the Col-  
597 0 background, showing fluorescence from 4',6-diamidino-2-phenylindole (DAPI) (F),  
598 GFP (G), and their overlay (H). Roots were collected 6 das. Scale bars: 20  $\mu$ m.

599

600 **Figure 4.** Comparison of the 3D structures of the VEN4 wild-type and E249L mutant  
601 (VEN4-0) proteins. A, Cartoon representation of the overlay of the 3D structures of VEN4  
602 (colored in gray) and VEN4-0 (colored in purple), with a close-up view of the vicinity of  
603 the substituted E. All residues affected by the mutation, whose side chains show different  
604 angles between wild-type and mutant proteins, are labeled. B and C, Non-covalent  
605 interactions disrupted by the E249L substitution; the distances between the interacting  
606 atoms are indicated in angstroms ( $\text{\AA}$ ). The hydrogen bonds and salt bridges are  
607 represented by green and yellow dotted lines, respectively. The interacting oxygen and  
608 nitrogen atoms are highlighted in red and blue, respectively.

609

610 **Figure 5.** Synergistic morphological phenotypes of the double mutants and  
611 sesquimutants derived from crosses of *ven4-0* and *ven4-2* to *tso2-1* and *dov1*. A to N,  
612 Rosettes from the *ven4-0* (A), *ven4-2* (B), *tso2-1* (C), and *dov1* (D) single mutants; the  
613 *ven4-0 tso2-1* (E and M), *ven4-2 tso2-1* (F and N), *ven4-0 dov1* (G), and *ven4-2 dov1*  
614 (H) double mutants; and the *ven4-0/ven4-0;TSO2/tso2-1* (I), *ven4-2/ven4-2;TSO2/tso2-*  
615 *1* (J), *VEN4/ven4-0;tso2-1/tso2-1* (K), and *VEN4/ven4-2;tso2-1/tso2-1* (L)  
616 sesquimutants. The *ven4-0 tso2-1* (E and M) and *ven4-2 tso2-1* (F and N) double  
617 mutants show small rosettes, chlorotic leaves with white sectors (E and F), callus-like  
618 morphology (M), and short stems with aberrant flowers (N). O, Open immature siliques  
619 of *ven4-0*, *ven4-2*, *tso2-1*, *ven4-0 tso2-1*, and *ven4-2 tso2-1* plants. P, Flowers of *ven4-*  
620 *0*, *ven4-2*, *tso2-1*, *ven4-0 tso2-1*, and *ven4-2 tso2-1* plants. Q, Siliques of *ven4-0*, *ven4-*  
621 *2*, *tso2-1*, *ven4-0 tso2-1*, and *ven4-2 tso2-1* plants. Photographs were taken 15 (A to L),  
622 30 (M and N), and 65 (O to Q) das. Scale bars: 1 mm.

623

624 **Figure 6.** Amino acid levels are altered in the *ven4-0* mutant. Abundances of some  
625 amino acids in third- and fourth-node leaves of *Ler* (n = 14) and *ven4-0* (n = 6) plants  
626 collected 21 das. Metabolite abundances are median values normalized to *Ler*. Asterisks  
627 indicate values significantly different from those of *Ler* in a Student's *t*-test (\**P* < 0.05,  
628 \*\**P* < 0.01, and \*\*\**P* < 0.001).

629

630 **Figure 7.** At5g40290 expression is undetectable in Col-0 and *ven4-2*. A, Alignment of

631 the GeneChip Arabidopsis Genome ATH1 Array 249399\_at and 249403\_at probe  
632 sequences from Affymetrix with their complementary regions in *VEN4* and At5g40290.  
633 B, Structures of the paralogous genes *VEN4* and At5g40290. Arrows represent the  
634 At5g40290\_F2, At5g40290\_F3, and At5g40290\_R4 primers (shown as F2, F3, and R4,  
635 respectively; not drawn to scale), which are partially or fully complementary to their target  
636 sequences in *VEN4* and At5g40290, respectively. The triangles indicate the T-DNA  
637 insertions in *ven4-2* and the SALK\_121024 line. C, Sequences of the At5g40290\_F2,  
638 At5g40290\_F3, and At5g40290\_R4 primers, aligned with their complementary sites in  
639 *VEN4* and At5g40290. D, 1% agarose gels stained with ethidium bromide showing the  
640 PCR amplification products obtained using genomic DNA (gDNA) and cDNA from Col-0  
641 and *ven4-2* as templates and the indicated primer pairs. The *ACT2* gene was amplified  
642 as a control for genomic DNA and cDNA integrity using the ACT2\_F/R primer pair (see  
643 Supplementary Table S2).

644 **REFERENCES**

- 645 Alonso, J.M., Stepanova, A.N., Leisse, T.J., Kim, C.J., Chen, H., Shinn, P., Stevenson,  
646 D.K., Zimmerman, J., Barajas, P., Cheuk, R., Gadrinab, C., Heller, C., Jeske, A.,  
647 Koesema, E., Meyers, C.C., Parker, H., Prednis, L., Ansari, Y., Choy, N., Deen, H.,  
648 Geralt, M., Hazari, N., Hom, E., Karnes, M., Mulholland, C., Ndubaku, R., Schmidt, I.,  
649 Guzman, P., Aguilar-Henonin, L., Schmid, M., Weigel, D., Carter, D.E., Marchand, T.,  
650 Risseeuw, E., Brogden, D., Zeko, A., Crosby, W.L., Berry, C.C., and Ecker, J.R.  
651 (2003). Genome-wide insertional mutagenesis of *Arabidopsis thaliana*. *Science* 301  
652 (5633), 653-657. doi: 10.1126/science.1086391
- 653 Aravind, L., and Koonin, E.V. (1998). The HD domain defines a new superfamily of metal-  
654 dependent phosphohydrolases. *Trends Biochem. Sci.* 23 (12), 469-472. doi:  
655 10.1016/s0968-0004(98)01293-6
- 656 Bensmihen, S., Hanna, A.I., Langlade, N.B., Micol, J.L., Bangham, A., and Coen, E.  
657 (2008). Mutational spaces for leaf shape and size. *HFSP J.* 2 (2), 110-120. doi:  
658 10.2976/1.2836738
- 659 Berná, G., Robles, P., and Micol, J.L. (1999). A mutational analysis of leaf  
660 morphogenesis in *Arabidopsis thaliana*. *Genetics* 152 (2), 729-742. doi:  
661 10.1093/genetics/152.2.729
- 662 Clough, S.J., and Bent, A.F. (1998). Floral dip: a simplified method for *Agrobacterium*-  
663 mediated transformation of *Arabidopsis thaliana*. *Plant J.* 16 (6), 735-743. doi:  
664 10.1046/j.1365-313x.1998.00343.x
- 665 Coggins, S.A., Mahboubi, B., Schinazi, R.F., and Kim, B. (2020). SAMHD1 functions and  
666 human diseases. *Viruses* 12 (4), 382. doi: 10.3390/v12040382
- 667 Cuadros-Inostroza, A., Caldana, C., Redestig, H., Kusano, M., Lisec, J., Peña-Cortés,  
668 H., Willmitzer, L., and Hannah, M.A. (2009). TargetSearch - a Bioconductor package  
669 for the efficient preprocessing of GC-MS metabolite profiling data. *BMC Bioinformatics*  
670 10, 428. doi: 10.1186/1471-2105-10-428
- 671 Curtis, M.D., and Grossniklaus, U. (2003). A gateway cloning vector set for high-  
672 throughput functional analysis of genes in planta. *Plant Physiol.* 133 (2), 462-469. doi:  
673 10.1104/pp.103.027979
- 674 Frappier, V., Chartier, M., and Najmanovich, R.J. (2015). ENCoM server: exploring  
675 protein conformational space and the effect of mutations on protein function and  
676 stability. *Nucleic Acids Res.* 43 (W1), W395-W400. doi: 10.1093/nar/gkv343
- 677 Garton, S., Knight, H., Warren, G.J., Knight, M.R., and Thorlby, G.J. (2007). *crinkled*  
678 *leaves 8* – A mutation in the large subunit of ribonucleotide reductase – leads to  
679 defects in leaf development and chloroplast division in *Arabidopsis thaliana*. *Plant J.*  
680 50 (1), 118-127. doi: 10.1111/j.1365-313X.2007.03035.x

- 681 Goddard, T.D., Huang, C.C., Meng, E.C., Pettersen, E.F., Couch, G.S., Morris, J.H., and  
682 Ferrin, T.E. (2018). UCSF ChimeraX: Meeting modern challenges in visualization and  
683 analysis. *Protein Sci.* 27 (1), 14-25. doi: 10.1002/pro.3235
- 684 Goldstone, D.C., Ennis-Adeniran, V., Hedden, J.J., Groom, H.C.T., Rice, G.I.,  
685 Christodoulou, E., Walker, P.A., Kelly, G., Haire, L.F., Yap, M.W., De Carvalho, L.P.S.,  
686 Stoye, J.P., Crow, Y.J., Taylor, I.A., and Webb, M. (2011). HIV-1 restriction factor  
687 SAMHD1 is a deoxynucleoside triphosphate triphosphohydrolase. *Nature* 480 (7377),  
688 379-382. doi: 10.1038/nature10623
- 689 González-Bayón, R., Kinsman, E.A., Quesada, V., Vera, A., Robles, P., Ponce, M.R.,  
690 Pyke, K.A., and Micol, J.L. (2006). Mutations in the *RETICULATA* gene dramatically  
691 alter internal architecture but have little effect on overall organ shape in Arabidopsis  
692 leaves. *J. Exp. Bot.* 57 (12), 3019-3031. doi: 10.1093/jxb/erl063
- 693 Guarino, E., Salguero, I., and Kearsley, S.E. (2014). Cellular regulation of ribonucleotide  
694 reductase in eukaryotes. *Semin. Cell. Dev. Biol.* 30, 97-103. doi:  
695 10.1016/j.semcdb.2014.03.030
- 696 Hellens, R.P., Edwards, E.A., Leyland, N.R., Bean, S., and Mullineaux, P.M. (2000).  
697 pGreen: a versatile and flexible binary Ti vector for *Agrobacterium*-mediated plant  
698 transformation. *Plant Mol. Biol.* 42 (6), 819-832. doi: 10.1023/a:1006496308160
- 699 Hricová, A., Quesada, V., and Micol, J.L. (2006). The *SCABRA3* nuclear gene encodes  
700 the plastid RpoTp RNA polymerase, which is required for chloroplast biogenesis and  
701 mesophyll cell proliferation in Arabidopsis. *Plant Physiol.* 141 (3), 942-956. doi:  
702 10.1104/pp.106.080069
- 703 Hung, W.-F., Chen, L.-J., Boldt, R., Sun, C.-W., and Li, H.-M. (2004). Characterization  
704 of Arabidopsis glutamine phosphoribosyl pyrophosphate amidotransferase-deficient  
705 mutants. *Plant Physiol.* 135 (3), 1314-1323. doi: 10.1104/pp.104.040956
- 706 Ittisoponpisan, S., Islam, S.A., Khanna, T., Alhuzimi, E., David, A., and Sternberg, M.J.E.  
707 (2019). Can predicted protein 3D structures provide reliable insights into whether  
708 missense variants are disease associated? *J. Mol. Biol.* 431 (11), 2197-2212. doi:  
709 10.1016/j.jmb.2019.04.009
- 710 Ji, X., Tang, C., Zhao, Q., Wang, W., and Xiong, Y. (2014). Structural basis of cellular  
711 dNTP regulation by SAMHD1. *Proc. Natl. Acad. Sci. USA* 111 (41), E4305–E4314.  
712 doi: 10.1073/pnas.1412289111
- 713 Ji, X., Wu, Y., Yan, J., Mehrens, J., Yang, H., Delucia, M., Hao, C., Gronenborn, A.M.,  
714 Skowronski, J., Ahn, J., and Xiong, Y. (2013). Mechanism of allosteric activation of  
715 SAMHD1 by dGTP. *Nat. Struct. Mol. Biol.* 20 (11), 1304-1309. doi:  
716 10.1038/nsmb.2692

- 717 Jordan, A., and Reichard, P. (1998). Ribonucleotide reductases. *Annu. Rev. Biochem.*  
718 67 (1), 71-98. doi: 10.1146/annurev.biochem.67.1.71
- 719 Jumper, J., Evans, R., Pritzel, A., Green, T., Figurnov, M., Ronneberger, O.,  
720 Tunyasuvunakool, K., Bates, R., Žídek, A., Potapenko, A., Bridgland, A., Meyer, C.,  
721 Kohl, S.a.A., Ballard, A.J., Cowie, A., Romera-Paredes, B., Nikolov, S., Jain, R., Adler,  
722 J., Back, T., Petersen, S., Reiman, D., Clancy, E., Zielinski, M., Steinegger, M.,  
723 Pacholska, M., Berghammer, T., Bodenstein, S., Silver, D., Vinyals, O., Senior, A.W.,  
724 Kavukcuoglu, K., Kohli, P., and Hassabis, D. (2021). Highly accurate protein structure  
725 prediction with AlphaFold. *Nature* 596 (7873), 583-589. doi: 10.1038/s41586-021-  
726 03819-2
- 727 Kilstrup, M., Hammer, K., Ruhdal Jensen, P., and Martinussen, J. (2005). Nucleotide  
728 metabolism and its control in lactic acid bacteria. *FEMS Microbiol. Rev.* 29 (3), 555-  
729 590. doi: 10.1016/j.femsre.2005.04.006
- 730 Kinsman, E.A., and Pyke, K.A. (1998). Bundle sheath cells and cell-specific plastid  
731 development in *Arabidopsis* leaves. *Development* 125 (10), 1815-1822. doi:  
732 10.1242/dev.125.10.1815
- 733 Kopka, J., Schauer, N., Krueger, S., Birkemeyer, C., Usadel, B., Bergmüller, E.,  
734 Dörmann, P., Weckwerth, W., Gibon, Y., Stitt, M., Willmitzer, L., Fernie, A.R., and  
735 Steinhauser, D. (2005). GMD@CSB.DB: the Golm Metabolome Database.  
736 *Bioinformatics* 21 (8), 1635-1638. doi: 10.1093/bioinformatics/bti236
- 737 Kretschmer, S., Wolf, C., König, N., Staroske, W., Guck, J., Häusler, M., Luksch, H.,  
738 Nguyen, L.A., Kim, B., Alexopoulou, D., Dahl, A., Rapp, A., Cardoso, M.C.,  
739 Shevchenko, A., and Lee-Kirsch, M.A. (2015). SAMHD1 prevents autoimmunity by  
740 maintaining genome stability. *Ann. Rheum. Dis.* 74 (3), e17. doi:  
741 10.1136/annrheumdis-2013-204845
- 742 Li, H., Culligan, K., Dixon, R.A., and Chory, J. (1995). *CUE1*: a mesophyll cell-specific  
743 positive regulator of light-controlled gene expression in *Arabidopsis*. *Plant Cell* 7 (10),  
744 1599-1610. doi: 10.1105/tpc.7.10.1599
- 745 Li, M., Zhang, D., Zhu, M., Shen, Y., Wei, W., Ying, S., Korner, H., and Li, J. (2017).  
746 Roles of SAMHD1 in antiviral defense, autoimmunity and cancer. *Rev. Med. Virol.* 27  
747 (4), e1931. doi: 10.1002/rmv.1931
- 748 Liseč, J., Schauer, N., Kopka, J., Willmitzer, L., and Fernie, A.R. (2006). Gas  
749 chromatography mass spectrometry-based metabolite profiling in plants. *Nat. Protoc.*  
750 1 (1), 387-396. doi: 10.1038/nprot.2006.59
- 751 Livak, K.J., and Schmittgen, T.D. (2001). Analysis of relative gene expression data using  
752 real-time quantitative PCR and the 2<sup>-</sup>( $\Delta\Delta C(T)$ ) method. *Methods* 25 (4), 402-  
753 408. doi: 10.1006/meth.2001.1262



- 754 Lu, C., Wang, Q., Jiang, Y., Zhang, M., Meng, X., Li, Y., Liu, B., Yin, Z., Liu, H., Peng,  
755 C., Li, F., Yue, Y., Hao, M., Sui, Y., Wang, L., Cheng, G., Liu, J., Chu, Z., Zhu, C.,  
756 Dong, H., and Ding, X. (2022). Discovery of a novel nucleoside immune signaling  
757 molecule 2'-deoxyguanosine in microbes and plants. *J. Adv. R.* doi:  
758 10.1016/j.jare.2022.06.014
- 759 Lundquist, P.K., Rosar, C., Bräutigam, A., and Weber, A.P.M. (2014). Plastid signals and  
760 the bundle sheath: mesophyll development in reticulate mutants. *Mol. Plant* 7 (1), 14-  
761 29. doi: 10.1093/mp/sst133
- 762 Mauney, C.H., and Hollis, T. (2018). SAMHD1: Recurring roles in cell cycle, viral  
763 restriction, cancer, and innate immunity. *Autoimmunity* 51 (3), 96-110. doi:  
764 10.1080/08916934.2018.1454912
- 765 Mollá-Morales, A., Sarmiento-Mañús, R., Robles, P., Quesada, V., González-Bayón, R.,  
766 Hannah, M., Willmitzer, L., Pérez-Pérez, J.M., Ponce, M.R., and Micol, J.L. (2011).  
767 Analysis of *ven3* and *ven6* reticulate mutants reveals the importance of arginine  
768 biosynthesis in Arabidopsis leaf development. *Plant J.* 65 (4), 335-345. doi:  
769 10.1111/j.1365-313X.2010.04425.x
- 770 Pérez-Pérez, J.M., Esteve-Bruna, D., González-Bayón, R., Kangasjärvi, S., Caldana, C.,  
771 Hannah, M.A., Willmitzer, L., Ponce, M.R., and Micol, J.L. (2013). Functional  
772 redundancy and divergence within the Arabidopsis RETICULATA-RELATED gene  
773 family. *Plant Physiol.* 162 (2), 589-603. doi: 10.1104/pp.113.217323
- 774 Pérez-Pérez, J.M., Rubio-Díaz, S., Dhondt, S., Hernández-Romero, D., Sánchez-  
775 Soriano, J., Beemster, G.T., Ponce, M.R., and Micol, J.L. (2011). Whole organ,  
776 venation and epidermal cell morphological variations are correlated in the leaves of  
777 *Arabidopsis* mutants. *Plant Cell Environ.* 34 (12), 2200-2211. doi: 10.1111/j.1365-  
778 3040.2011.02415.x
- 779 Pettersen, E.F., Goddard, T.D., Huang, C.C., Meng, E.C., Couch, G.S., Croll, T.I., Morris,  
780 J.H., and Ferrin, T.E. (2021). UCSF ChimeraX: Structure visualization for researchers,  
781 educators, and developers. *Protein Sci.* 30 (1), 70-82. doi: 10.1002/pro.3943
- 782 Pires, D.E.V., Ascher, D.B., and Blundell, T.L. (2014a). DUET: a server for predicting  
783 effects of mutations on protein stability using an integrated computational approach.  
784 *Nucleic Acids Res.* 42 (W1), W314-W319. doi: 10.1093/nar/gku411
- 785 Pires, D.E.V., Ascher, D.B., and Blundell, T.L. (2014b). mCSM: predicting the effects of  
786 mutations in proteins using graph-based signatures. *Bioinformatics* 30 (3), 335-342.  
787 doi: 10.1093/bioinformatics/btt691
- 788 Ponce, M.R., Quesada, V., and Micol, J.L. (1998). Rapid discrimination of sequences  
789 flanking and within T-DNA insertions in the *Arabidopsis* genome. *Plant J.* 14 (4), 497-  
790 501. doi: 10.1046/j.1365-313x.1998.00146.x

- 791 Ponce, M.R., Robles, P., and Micol, J.L. (1999). High-throughput genetic mapping in  
792 *Arabidopsis thaliana*. *Mol. Gen. Genet.* 261 (2), 408-415. doi:  
793 10.1007/s004380050982
- 794 Powell, R.D., Holland, P.J., Hollis, T., and Perrino, F.W. (2011). Aicardi-Goutières  
795 syndrome gene and HIV-1 restriction factor SAMHD1 is a dGTP-regulated  
796 deoxynucleotide triphosphohydrolase. *J. Biol. Chem.* 286 (51), 43596-43600. doi:  
797 10.1074/jbc.C111.317628
- 798 Quesada, V., Sarmiento-Mañús, R., González-Bayón, R., Hricová, A., Pérez-Marcos, R.,  
799 Graciá-Martínez, E., Medina-Ruiz, L., Leyva-Díaz, E., Ponce, M.R., and Micol, J.L.  
800 (2011). *Arabidopsis RUGOSA2* encodes an mTERF family member required for  
801 mitochondrion, chloroplast and leaf development. *Plant J.* 68 (4), 738-753. doi:  
802 10.1111/j.1365-313X.2011.04726.x
- 803 Rédei, G.P., and Hirono, Y. (1964). Linkage studies. *Arab. Inf. Serv.* 1, 9-10.
- 804 Robles, P., and Micol, J.L. (2001). Genome-wide linkage analysis of *Arabidopsis* genes  
805 required for leaf development. *Mol. Genet. Genomics* 266 (1), 12-19. doi:  
806 10.1007/s004380100535
- 807 Rodrigues, C.H., Pires, D.E., and Ascher, D.B. (2018). DynaMut: predicting the impact  
808 of mutations on protein conformation, flexibility and stability. *Nucleic Acids Res.* 46  
809 (W1), W350-W355. doi: 10.1093/nar/gky300
- 810 Rodrigues, C.H.M., Pires, D.E.V., and Ascher, D.B. (2021). DynaMut2: Assessing  
811 changes in stability and flexibility upon single and multiple point missense mutations.  
812 *Protein Sci.* 30 (1), 60-69. doi: 10.1002/pro.3942
- 813 Rosar, C., Kanonenberg, K., Nanda, A.M., Mielewicz, M., Bräutigam, A., Novák, O.,  
814 Strnad, M., Walter, A., and Weber, A.P. (2012). The leaf reticulate mutant *dov1* is  
815 impaired in the first step of purine metabolism. *Mol. Plant* 5 (6), 1227-1241. doi:  
816 10.1093/mp/sss045
- 817 Schauer, N., Steinhauser, D., Strelkov, S., Schomburg, D., Allison, G., Moritz, T.,  
818 Lundgren, K., Roessner-Tunali, U., Forbes, M.G., Willmitzer, L., Fernie, A.R., and  
819 Kopka, J. (2005). GC-MS libraries for the rapid identification of metabolites in complex  
820 biological samples. *FEBS Lett.* 579 (6), 1332-1337. doi: 10.1016/j.febslet.2005.01.029
- 821 Shigematsu, S., Hayashi, H., Yasui, K., and Matsuyama, T. (2014). SAM domain-  
822 containing N-terminal region of SAMHD1 plays a crucial role in its stabilization and  
823 restriction of HIV-1 infection. *Acta Med. Nagasaki* 58 (4), 103-111. doi:  
824 10.11343/amn.58.103
- 825 Stillman, B. (2013). Deoxynucleoside triphosphate (dNTP) synthesis and destruction  
826 regulate the replication of both cell and virus genomes. *Proc. Natl. Acad. Sci. USA*  
827 110 (35), 14120-14121. doi: 10.1073/pnas.1312901110

- 828 Tang, L.Y., Matsushima, R., and Sakamoto, W. (2012). Mutations defective in  
829 ribonucleotide reductase activity interfere with pollen plastid DNA degradation  
830 mediated by DPD1 exonuclease. *Plant J.* 70 (4), 637-649. doi: 10.1111/j.1365-  
831 313X.2012.04904.x
- 832 Varadi, M., Anyango, S., Deshpande, M., Nair, S., Natassia, C., Yordanova, G., Yuan,  
833 D., Stroe, O., Wood, G., Laydon, A., Žídek, A., Green, T., Tunyasuvunakool, K.,  
834 Petersen, S., Jumper, J., Clancy, E., Green, R., Vora, A., Lutfi, M., Figurnov, M.,  
835 Cowie, A., Hobbs, N., Kohli, P., Kleywegt, G., Birney, E., Hassabis, D., and Velankar,  
836 S. (2021). AlphaFold Protein Structure Database: massively expanding the structural  
837 coverage of protein-sequence space with high-accuracy models. *Nucleic Acids Res.*  
838 50 (D1), D439-D444. doi: 10.1093/nar/gkab1061
- 839 Wang, C., and Liu, Z. (2006). Arabidopsis ribonucleotide reductases are critical for cell  
840 cycle progression, DNA damage repair, and plant development. *Plant Cell* 18 (2), 350-  
841 365. doi: 10.1105/tpc.105.037044
- 842 Wang, H., Tu, R., Ruan, Z., Wu, D., Peng, Z., Zhou, X., Liu, Q., Wu, W., Cao, L., Cheng,  
843 S., Sun, L., Zhan, X., and Shen, X. (2022). *STRIPE3*, encoding a human dNTPase  
844 SAMHD1 homolog, regulates chloroplast development in rice. *Plant Sci.* 323, 111395.  
845 doi: 10.1016/j.plantsci.2022.111395
- 846 Wilson-Sánchez, D., Martínez-López, S., Navarro-Cartagena, S., Jover-Gil, S., and  
847 Micol, J.L. (2018). Members of the DEAL subfamily of the DUF1218 gene family are  
848 required for bilateral symmetry but not for dorsoventrality in Arabidopsis leaves. *New*  
849 *Phytol.* 217 (3), 1307-1321. doi: 10.1111/nph.14898
- 850 Witte, C.-P., and Herde, M. (2020). Nucleotide metabolism in plants. *Plant Physiol.* 182  
851 (1), 63-78. doi: 10.1104/pp.19.00955
- 852 Worth, C.L., Preissner, R., and Blundell, T.L. (2011). SDM—a server for predicting  
853 effects of mutations on protein stability and malfunction. *Nucleic Acids Res.* 39 (W1),  
854 W215-W222. doi: 10.1093/nar/gkr363
- 855 Xu, D., Leister, D., and Kleine, T. (2020). VENOSA4, a human dNTPase SAMHD1  
856 homolog, contributes to chloroplast development and abiotic stress tolerance. *Plant*  
857 *Physiol.* 182 (2), 721-729. doi: 10.1104/pp.19.01108
- 858 Yoshida, Y., Sarmiento-Mañús, R., Yamori, W., Ponce, M.R., Micol, J.L., and Tsukaya,  
859 H. (2018). The Arabidopsis *phyB-9* mutant has a second-site mutation in the  
860 *VENOSA4* gene that alters chloroplast size, photosynthetic traits, and leaf growth.  
861 *Plant Physiol.* 178 (1), 3-6. doi: 10.1104/pp.18.00764

Sarmiento-Mañús *et al.*, Figure 1

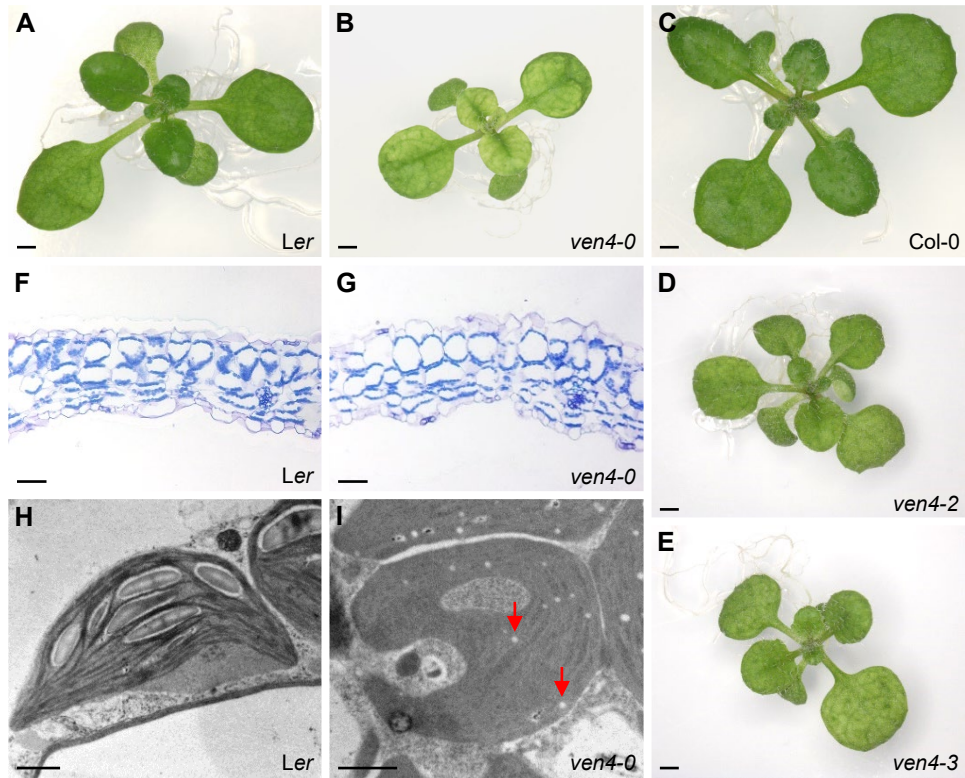

Sarmiento-Mañús *et al.*, Figure 2

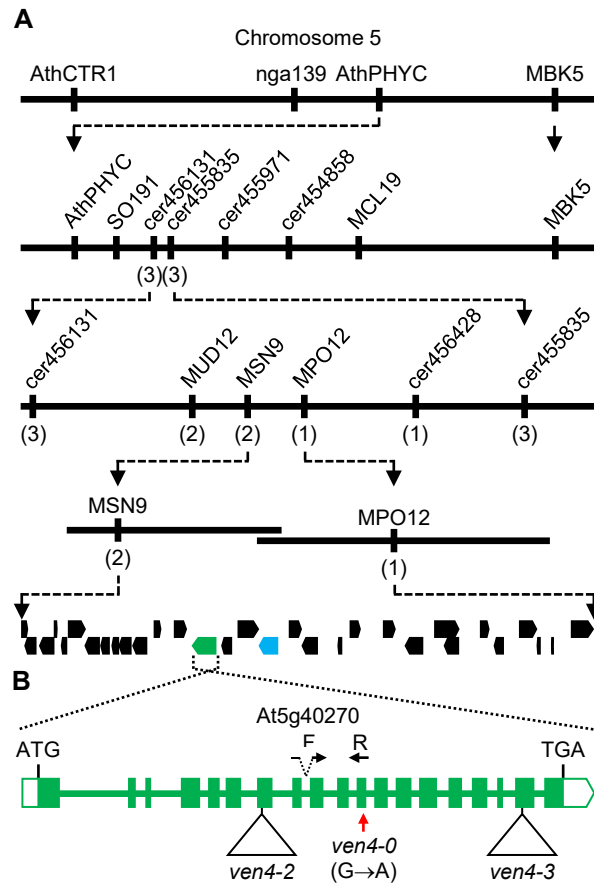

Sarmiento-Mañús *et al.*, Figure 3

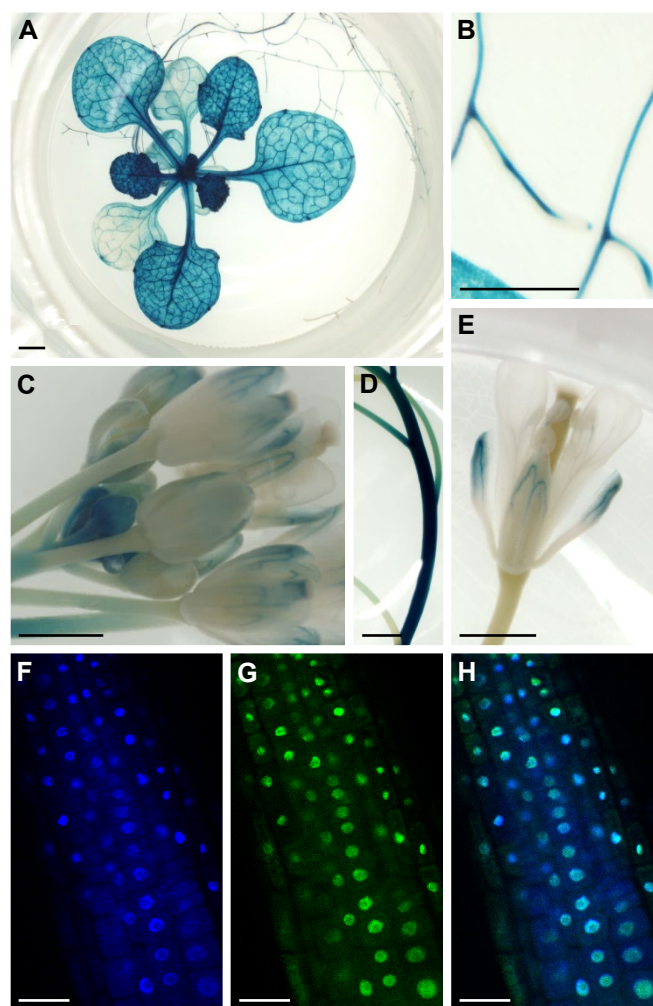

Sarmiento-Mañús *et al.*, Figure 4

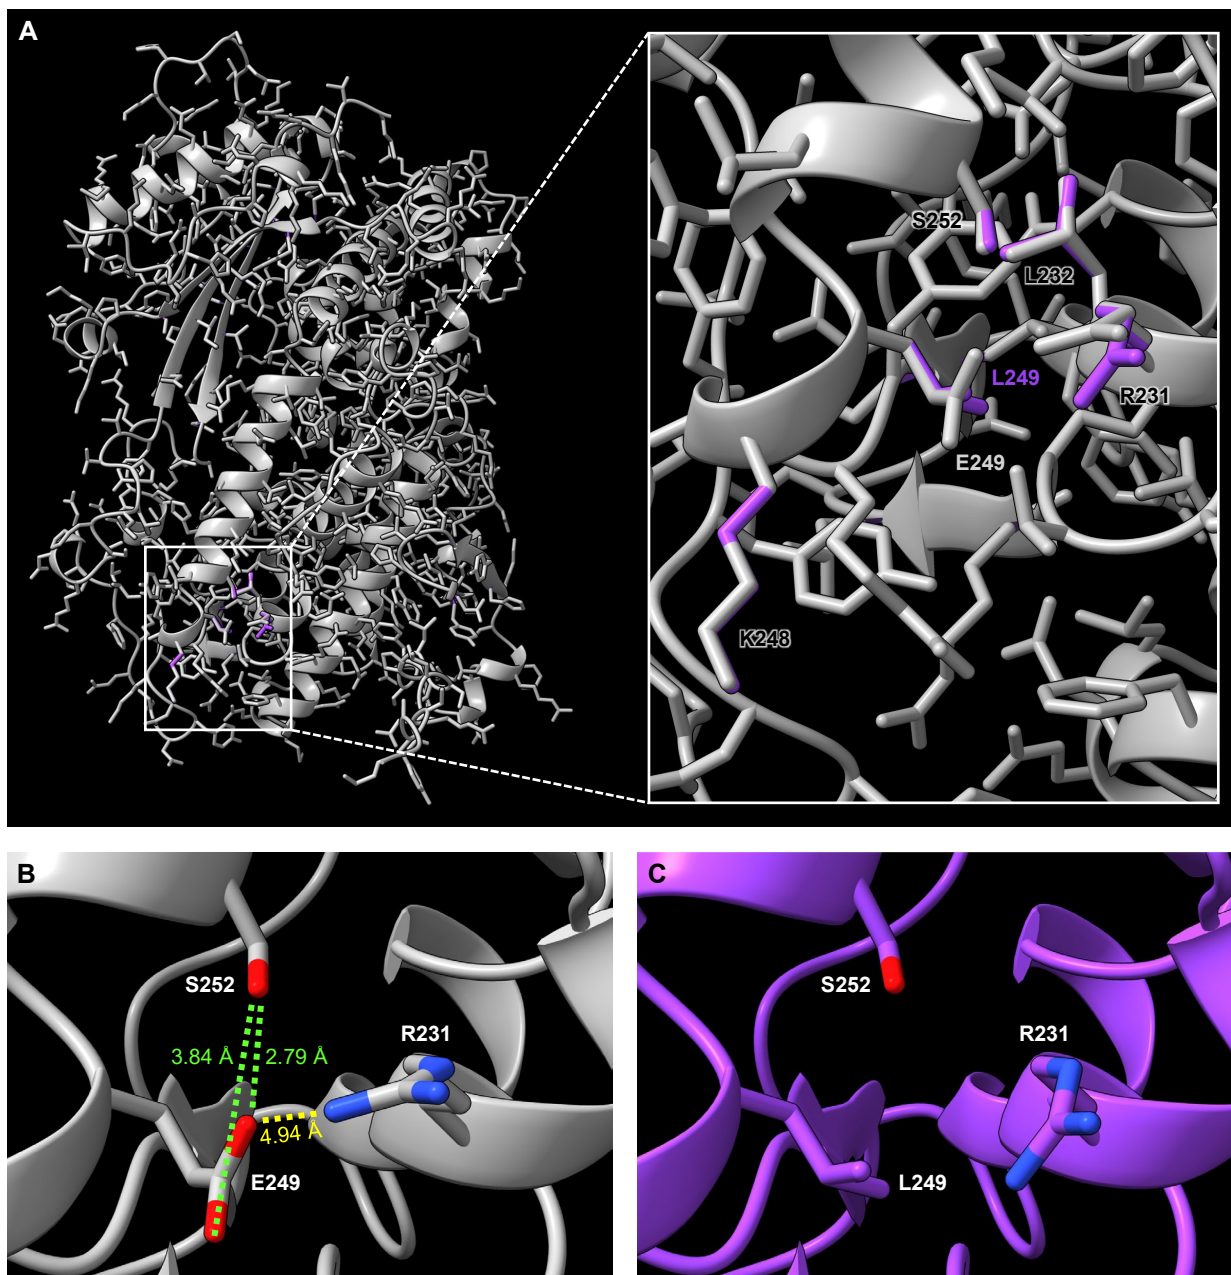

Sarmiento-Mañús *et al.*, Figure 5

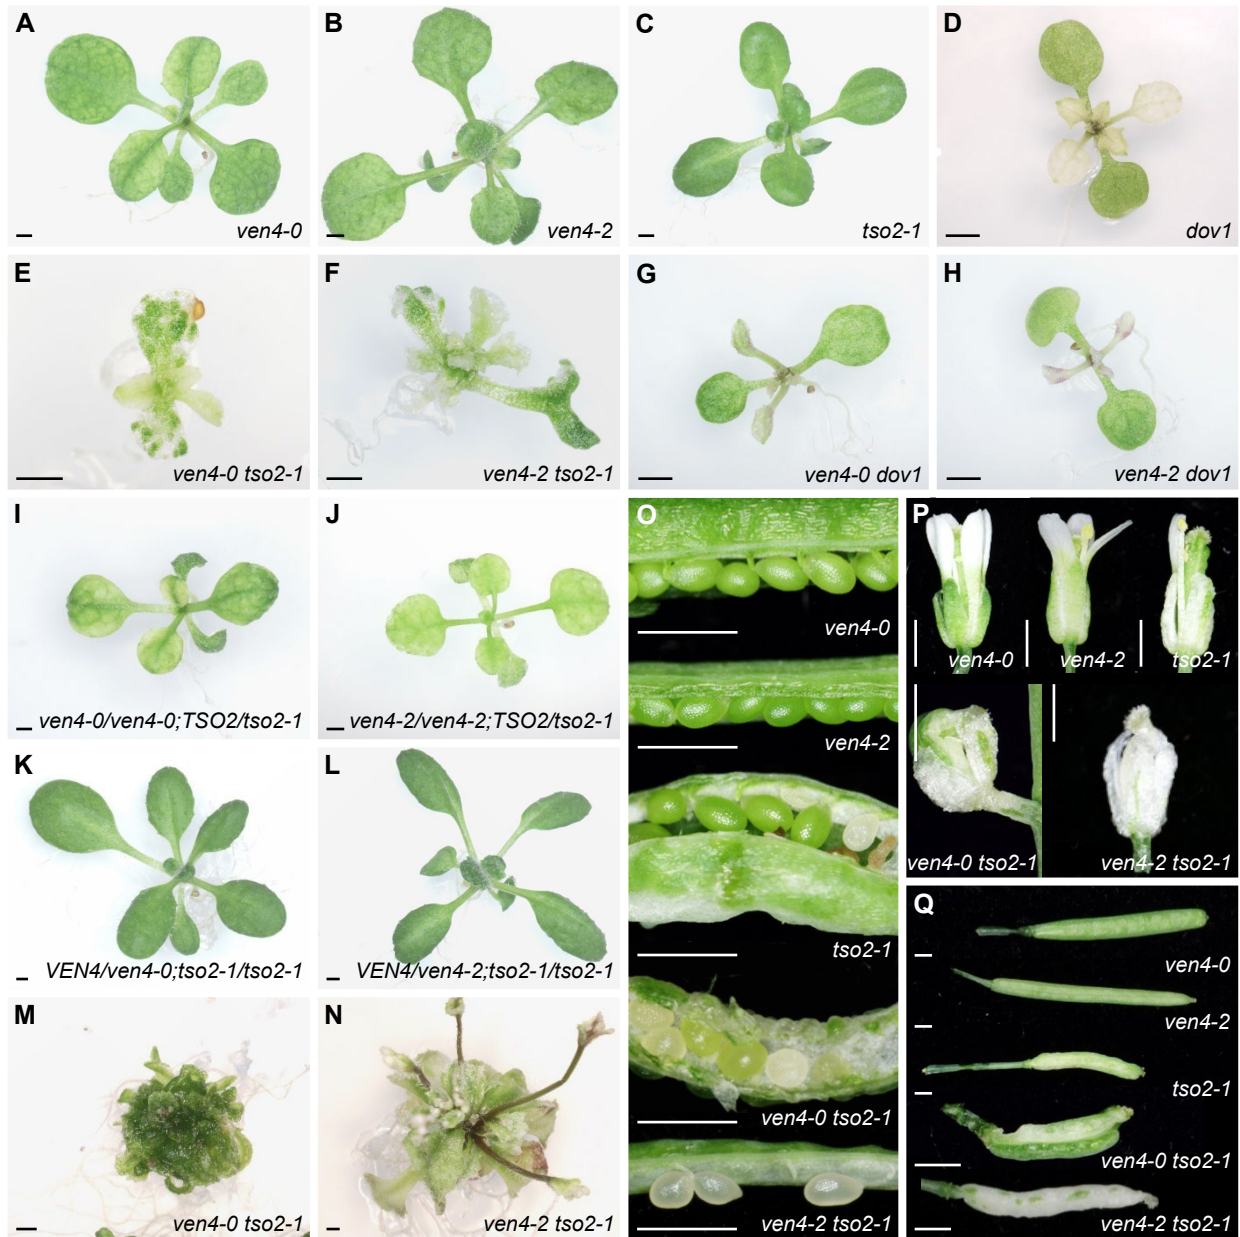



Sarmiento-Mañús *et al.*, Figure 6

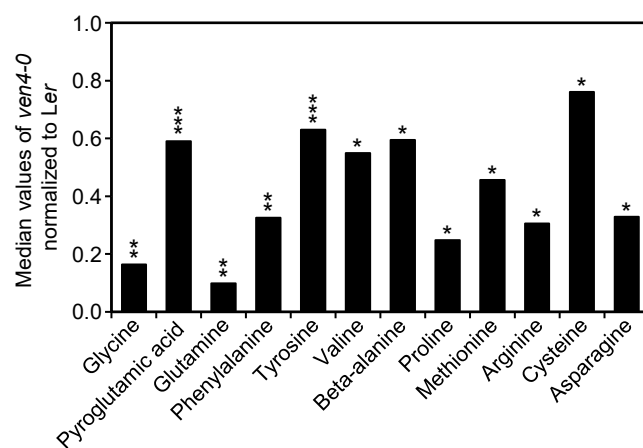

Sarmiento-Mañús *et al.*, Figure 7

**A**

```

CTCGAGCTGATCTTTGTGGAACCGT At5g40290
|||||
CTCGAGCTGATCTTTGTGGAACCGT ATH1 249399_at At5g40290
|||||
CTCGAGCTGATCTTTATCGAACCGT VEN4

GCTGATGATAGTAGATGCCATGGTC VEN4
|||||
GCTGATGATAGTAGATGCCATGGTC ATH1 249403_at VEN4
|||||
GCTTATGATAGTAGATGCAATGGTC At5g40290

```

**B**

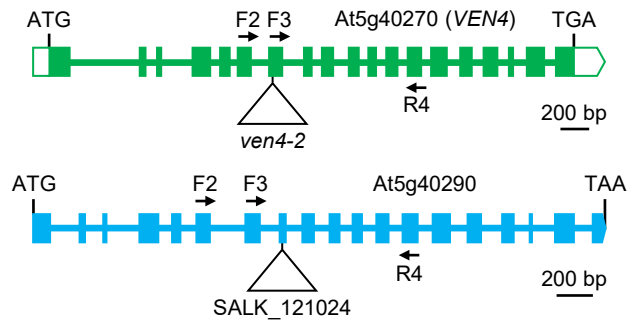

**C**

```

TATGTTTGAGCGTGAGTTCCTC At5g40290
|||||
TATGTTTGAGCGTGAGTTCCTC At5g40290_F2
|||||
TATGTTTGAGCGTGAATTCCT VEN4

ACATCACATAGATGTTGATGCAA At5g40290
|||||
ACATCACATAGATGTTGATGCAA At5g40290_F3
|||||
AC-TGACAGAGACGATGAGAGTC VEN4

ATCATAGAAGAAATCTCCAAGAC At5g40290
|||||
ATCATAGAAGAAATCTCCAAGAC At5g40290_R4
|||||
ATCATAGAAGAAATTTCCAAATG VEN4

```

**D**

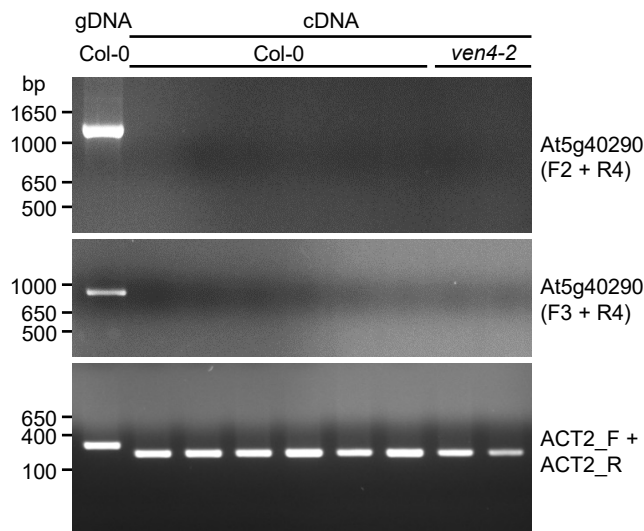

Source: https://www.biorxiv.org/content/biorxiv/early/2023/04/01/2023.03.30.534755.full.pdf
